# Supplementary material for: Detailed analysis of the plasma extracellular vesicle proteome after separation from lipoproteins
Source: Springer Nature journal article supplement (doi:10.1007/s00018-018-2773-4), 2018-02-13
Supplement: 18_2018_2773_MOESM2_ESM.pdf [file 18_2018_2773_MOESM2_ESM.pdf]

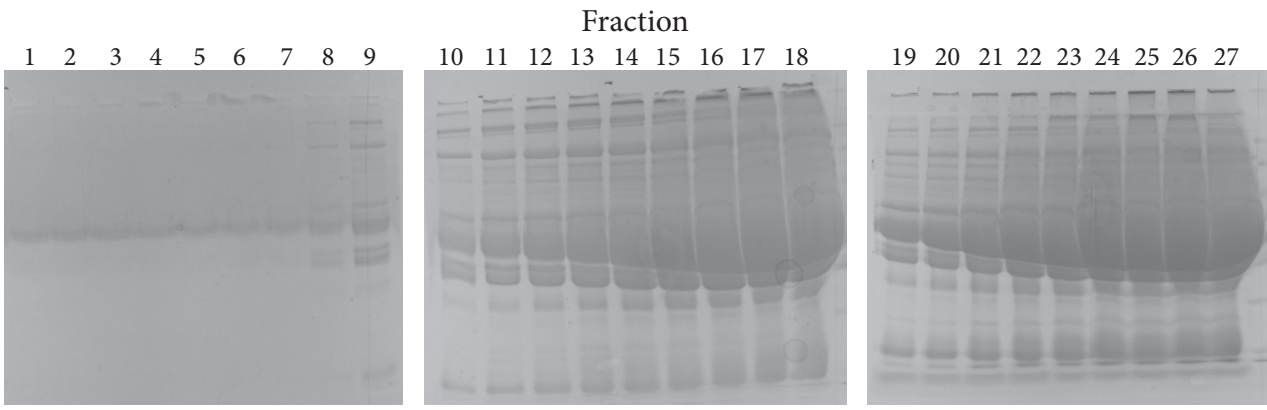

**Supplementary Figure 2**
